# Supplementary material for: Spin-state switching of indium-phthalocyanine on Pb(100)
Source: Royal Society of Chemistry journal article supplement (doi:10.1039/d4ra07270g), 2024-01-01
Supplement: d4ra07270g1.pdf [file d4ra07270g1.pdf]

**Supporting Information:**  
**Spin-State Switching of**  
**Indium-Pthalocyanine on Pb(100)**

Niklas Ide, Arnab Banerjee, Alexander Weismann, and Richard Berndt\*

*Institut für Experimentelle und Angewandte Physik,  
Christian-Albrechts-Universität, 24098 Kiel, Germany*

E-mail: [berndt@physik.uni-kiel.de](mailto:berndt@physik.uni-kiel.de)

## Adsorption Site Determination

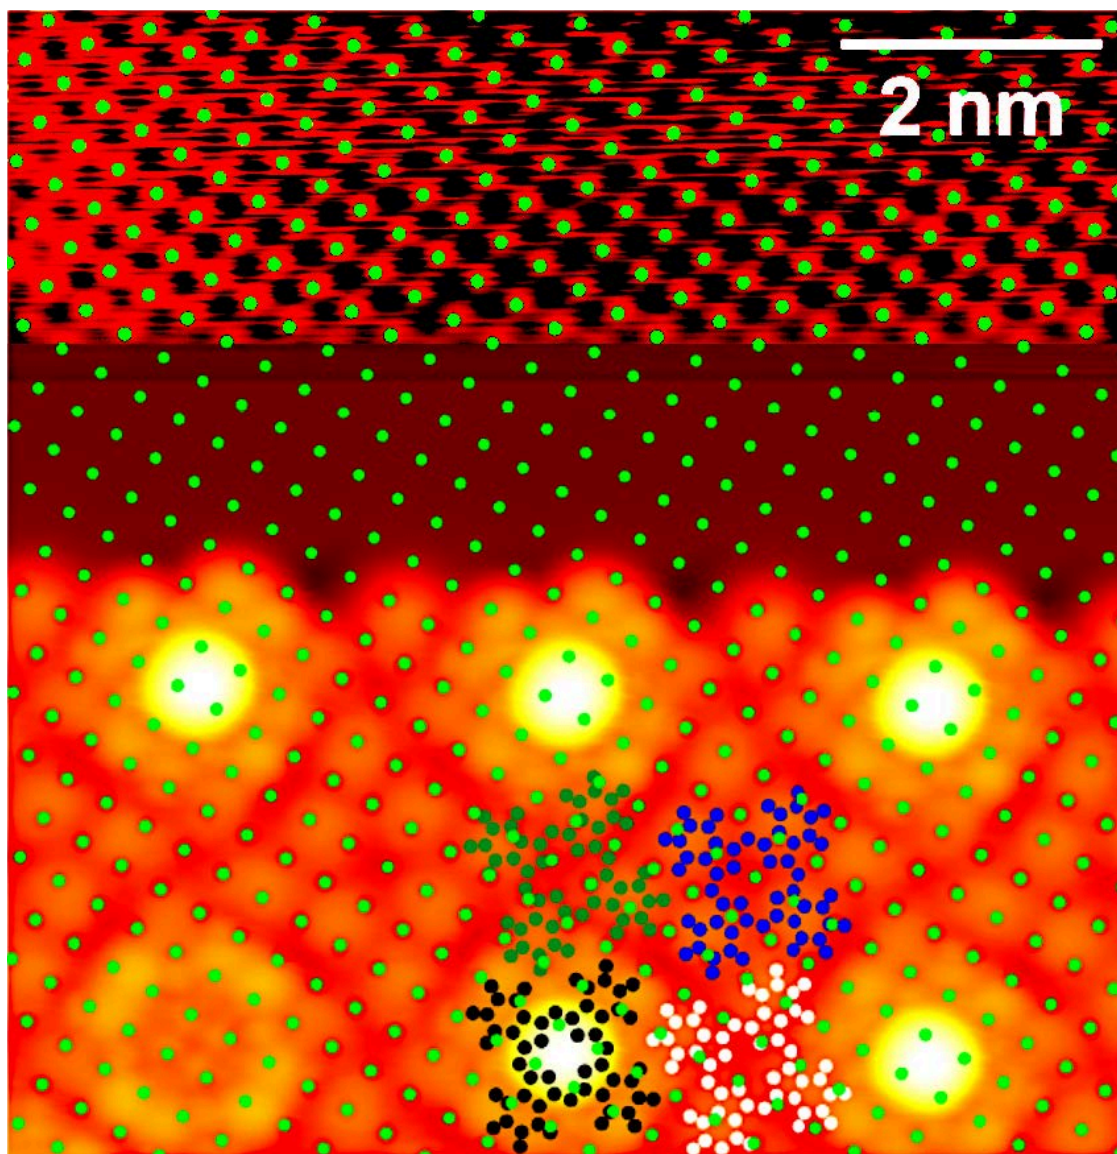

Figure S1: Topograph ( $V = 10$  mV) of an ordered island of InPc molecules. The current setpoint was  $I = 5$  nA in the upper part of the image, where the substrate atoms are resolved. The Pb(100) lattice is marked by green dots and has been extrapolated to the bottom part of the image. The current was lowered to 100 pA in the lower part to image the molecular layer. Four adsorption sites (top, bridge x, hollow, bridge y) have been identified and are indicated by blue, green, black, and white models of InPc molecules. The color scales used in the upper and lower parts of the image have been separately adjusted.

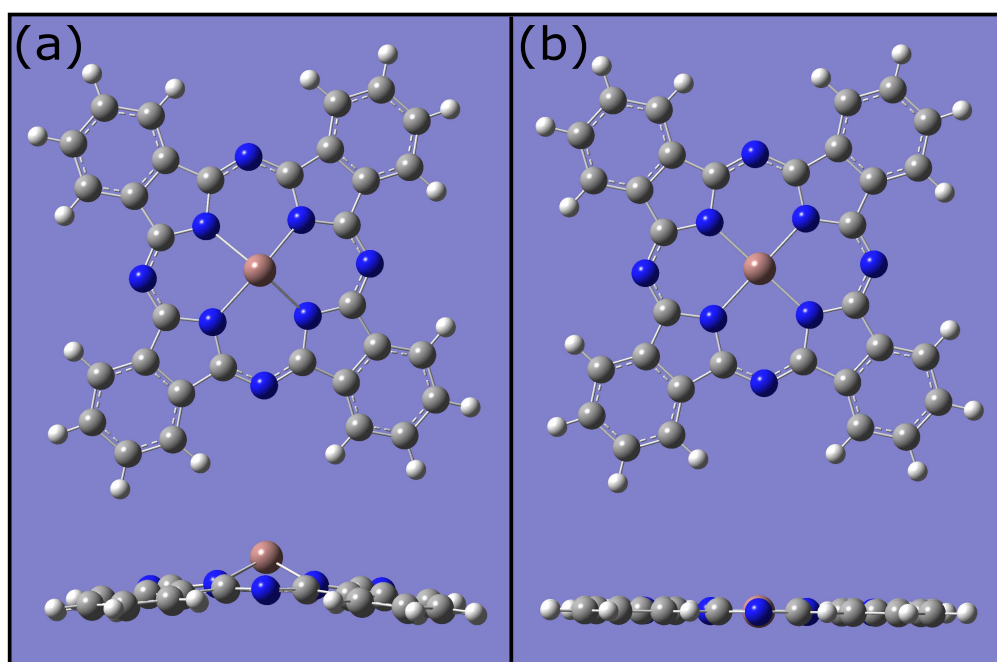

Figure S2: DFT-optimized structures of (a) neutral and (b) singly positively charged InPc. The neutral InPc molecule displays a shuttlecock-like shape while the charged molecule is planar.
